# Supplementary material for: Metabolic phenotyping of acquired ampicillin resistance using microbial volatiles from Escherichia coli cultures
Source: PubMed Central journal article supplement (PMC9804386; doi:10.1111/jam.15716), 2022-08-02

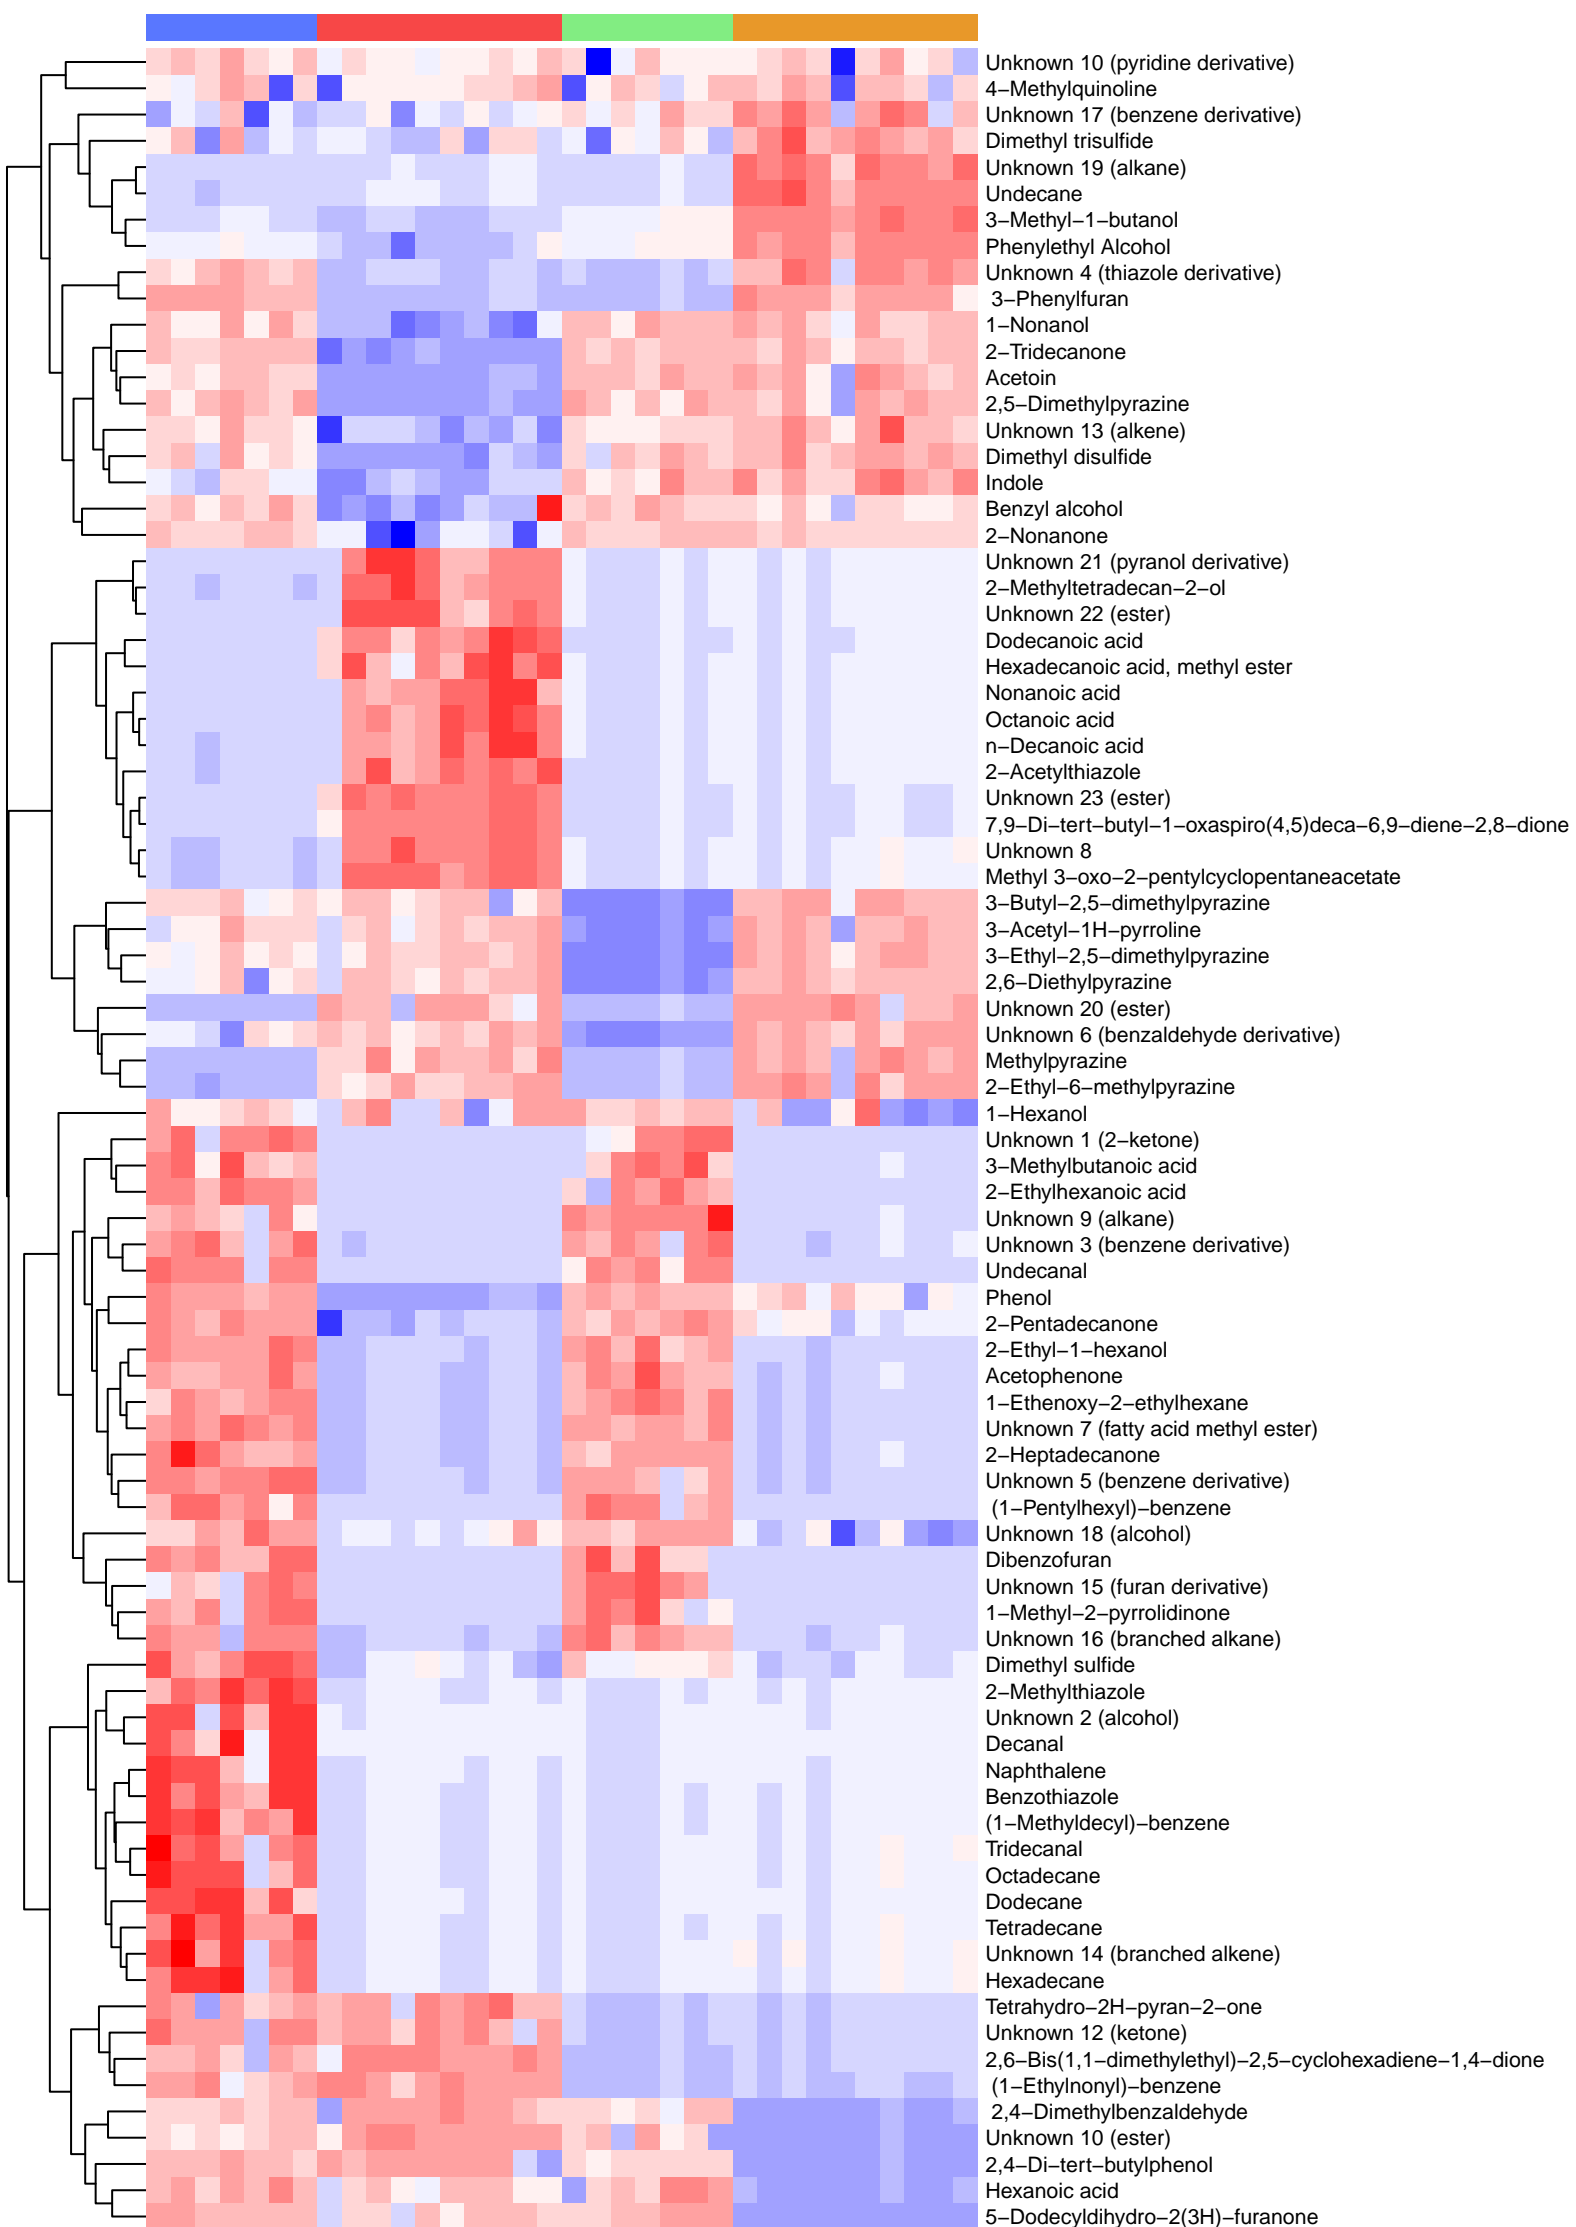

Supplement: JAM-133-2445-s001.pdf [file JAM-133-2445-s001.pdf]
